# Supplementary material for: The TbD1 Locus Mediates a Hypoxia-Induced Copper Response in Mycobacterium bovis
Source: Front Microbiol. 2022 Apr 14;13:817952. doi: 10.3389/fmicb.2022.817952 (PMC9048740; doi:10.3389/fmicb.2022.817952)
Supplement: Supplementary file 2 [file Table_2.xlsx]

## Sheet: Sheet1
DEG_Rv_tag	DEG_Mb_tag	DEG_input_venn	EHR	IHR
Rv0016c	Mb0016C	oxyR'	Rv0048c	Rv0569
Rv0022c	Mb0022C	Rv0016c	Rv0196	Rv1734c
Rv0031	Mb0032	Rv0022c	Rv0209	Rv1737c
Rv0042c	Mb0043C	Rv0031	Rv0232	Rv2003c
Rv0049	Mb0050	Rv0042c	Rv0233	Rv3841
Rv0050	Mb0051	Rv0049	Rv0250c	Rv0079
Rv0051	Mb0052	Rv0050	Rv0268c	Rv0080
Rv0052	Mb0053	Rv0051	Rv0349	Rv0081
Rv0064A	Mb0065A	Rv0052	Rv0352	Rv0082
Rv0065	Mb0066	Rv0064A	Rv0367c	Rv0083
Rv0076c	Mb0078C	Rv0065	Rv0387c	Rv0570
Rv0077c	Mb0079C	Rv0076c	Rv0388c	Rv0571c
Rv0078A	Mb0081C	Rv0077c	Rv0474	Rv0572c
Rv0079	Mb0082	Rv0078A	Rv0494	Rv0574c
Rv0080	Mb0083	Rv0079	Rv0551c	Rv1736c
Rv0081	Mb0084	Rv0080	Rv0563	Rv1738
Rv0082	Mb0085	Rv0081	Rv0614	Rv1812c
Rv0083	Mb0086	Rv0082	Rv0653c	Rv1813c
Rv0084	Mb0087	Rv0083	Rv0670	Rv1996
Rv0085	Mb0088	Rv0084	Rv0726c	Rv1997
Rv0086	Mb0089	Rv0085	Rv0753c	Rv2004c
Rv0087	Mb0090	Rv0086	Rv0757	Rv2005c
Rv0089	Mb0092	Rv0087	Rv0846c	Rv2006
Rv0090	Mb0093	Rv0089	Rv0872c	Rv2007c
Rv0094c	Mb0097C	Rv0090	Rv0940c	Rv2028c
Rv0096	Mb0099	Rv0094c	Rv0967	Rv2029c
Rv0098	Mb0101	Rv0096	Rv1082	Rv2030c
Rv0099	Mb0102	Rv0098	Rv1088	Rv2031c
Rv0100	Mb0103	Rv0099	Rv1152	Rv2032
Rv0105c	Mb0108C	Rv0100	Rv1243c	Rv2623
Rv0116c	Mb0120C	Rv0105c	Rv1255c	Rv2624c
Rv0140	Mb0145	Rv0116c	Rv1256c	Rv2625c
Rv0141c	Mb0146C	Rv0140	Rv1375	Rv2629
Rv0142	Mb0147	Rv0141c	Rv1403c	Rv2630
Rv0146	Mb0151	Rv0142	Rv1470	Rv2631
Rv0150c	Mb0155C	Rv0146	Rv1578c	Rv3126c
Rv0166	Mb0172	Rv0150c	Rv1623c	Rv3127
Rv0167	Mb0173	Rv0166	Rv1652	Rv3128c
Rv0169	Mb0175	Rv0167	Rv1669	Rv3129
Rv0171	Mb0177	Rv0169	Rv1744c	Rv3130c
Rv0172	Mb0178	Rv0171	Rv1755c	Rv3131
Rv0173	Mb0179	Rv0172	Rv1760	Rv3132c
Rv0174	Mb0180	Rv0173	Rv1766	Rv3133c
Rv0186	Mb0192	Rv0174	Rv1874	Rv3134c
Rv0186A	Mb0192A	Rv0186	Rv1888c	Rv1733c
Rv0188	Mb0194	Rv0186A	Rv1891	Rv2626c
Rv0195	Mb0201	Rv0188	Rv1893	Rv2627c
Rv0211	Mb0217	Rv0195	Rv1909c	Rv2628
Rv0212c	Mb0218C	Rv0211	Rv1926c	Rv2830c
Rv0216	Mb0222	Rv0212c	Rv1951c
Rv0227c	Mb0232C	Rv0216	Rv1954c
Rv0244c	Mb0250C	Rv0227c	Rv1957
Rv0245	Mb0251	Rv0244c	Rv1958c
Rv0251c	Mb0257C	Rv0245	Rv1963c
Rv0252	Mb0258	Rv0251c	Rv1974
Rv0253	Mb0259	Rv0252	Rv2022c
Rv0254c	Mb0260C	Rv0253	Rv2050
Rv0259c	Mb0265C	Rv0254c	Rv2098c
Rv0260c	Mb0266C	Rv0259c	Rv2122c
Rv0261c	Mb0267C	Rv0260c	Rv2137c
Rv0275c	Mb0281C	Rv0261c	Rv2185c
Rv0276	Mb0282	Rv0275c	Rv2217
Rv0287	Mb0295	Rv0276	Rv2243
Rv0288	Mb0296	Rv0287	Rv2299c
Rv0322	Mb0330	Rv0288	Rv2324
Rv0323c	Mb0331C	Rv0322	Rv2374c
Rv0324	Mb0332	Rv0323c	Rv2389c
Rv0325	Mb0333	Rv0324	Rv2390c
Rv0327c	Mb0334C	Rv0325	Rv2412
Rv0328	Mb0335	Rv0327c	Rv2497c
Rv0329c	Mb0336C	Rv0328	Rv2498c
Rv0330c	Mb0337C	Rv0329c	Rv2499c
Rv0331	Mb0338	Rv0330c	Rv2500c
Rv0336	Mb0343	Rv0331	Rv2526
Rv0341	Mb0348	Rv0336	Rv2527
Rv0346c	Mb0354C	Rv0341	Rv2557
Rv0347	Mb0355	Rv0346c	Rv2558
Rv0350	Mb0358	Rv0347	Rv2583c
Rv0351	Mb0359	Rv0350	Rv2653c
Rv0360c	Mb0367C	Rv0351	Rv2657c
Rv0368c	Mb0375C	Rv0360c	Rv2658c
Rv0372c	Mb0379C	Rv0368c	Rv2660c
Rv0374c	Mb0381C	Rv0372c	Rv2663
Rv0384c	Mb0391C	Rv0374c	Rv2664
Rv0398c	Mb0404C	Rv0384c	Rv2687c
Rv0401	Mb0407	Rv0398c	Rv2688c
Rv0429c	Mb0437C	Rv0401	Rv2693c
Rv0430	Mb0438	Rv0429c	Rv2699c
Rv0451c	Mb0459C	Rv0430	Rv2700
Rv0452	Mb0460	Rv0451c	Rv2731
Rv0456A	Mb0465C	Rv0452	Rv2744c
Rv0466	Mb0475	Rv0456A	Rv2745c
Rv0488	Mb0498	Rv0466	Rv2764c
Rv0515	Mb0528	Rv0488	Rv2876
Rv0516c	Mb0529C	Rv0515	Rv2964
Rv0518	Mb0531	Rv0516c	Rv3007c
Rv0520	Mb0533	Rv0518	Rv3016
Rv0521	Mb0534	Rv0520	Rv3031
Rv0528	Mb0541	Rv0521	Rv3066
Rv0529	Mb0542	Rv0528	Rv3071
Rv0530A	Mb0543A	Rv0529	Rv3174
5' end of Rv0570	Mb0585	Rv0530A	Rv3175
Rv0571c	Mb0586C	Rv0570	Rv3180c
Rv0572c	Mb0587C	Rv0571c	Rv3188
Rv0573c	Mb0588C	Rv0572c	Rv3221A
Rv0574c	Mb0589C	Rv0573c	Rv3223c
5' end of Rv0575c	Mb0590C	Rv0574c	Rv3343c
Rv0586	Mb0601	Rv0575c	Rv3418c
Rv0587	Mb0602	Rv0586	Rv3480c
Rv0588	Mb0603	Rv0587	Rv3508
Rv0589	Mb0604	Rv0588	Rv3572
Rv0612	Mb0629	Rv0589	Rv3597c
Rv0622	Mb0638	Rv0612	Rv3628
Rv0654	Mb0673	Rv0622	Rv3747
Rv0656c	Mb0675C	Rv0654	Rv3819
Rv0687	Mb0706	Rv0656c	Rv3832c
Rv0688	Mb0707	Rv0687	Rv3837c
Rv0689c	Mb0708C	Rv0688	Rv3848
Rv0691c	Mb0710C	Rv0689c	Rv3862c
Rv0706	Mb0726	Rv0691c	Rv3864
Rv0707	Mb0727	Rv0706	Rv3903c
Rv0708	Mb0728	Rv0707	Rv0031
Rv0709	Mb0729	Rv0708	Rv0084
Rv0722	Mb0743	Rv0709	Rv0089
Rv0725c	Mb0746C	Rv0722	Rv0116c
Rv0728c	Mb0749C	Rv0725c	Rv0140
Rv0754	Mb0776	Rv0728c	Rv0171
Rv0760c	Mb0783C	Rv0754	Rv0186
Rv0762c	Mb0785C	Rv0760c	Rv0188
Rv0763c	Mb0786C	Rv0762c	Rv0244c
Rv0764c	Mb0787C	Rv0763c	Rv0251c
Rv0765c	Mb0788C	Rv0764c	Rv0324
Rv0766c	Mb0789C	Rv0765c	Rv0325
Rv0767c	Mb0790C	Rv0766c	Rv0327c
Rv0768	Mb0791	Rv0767c	Rv0328
Rv0789c	Mb0813C	Rv0768	Rv0347
Rv0790c	Mb0814C	Rv0789c	Rv0350
Rv0791c	Mb0815C	Rv0790c	Rv0384c
Rv0792c	Mb0816C	Rv0791c	Rv0520
Rv0793	Mb0817	Rv0792c	Rv0521
3' end of Rv0794c	Mb0818C	Rv0793	Rv0575c
Rv0800	Mb0823	Rv0794c	Rv0654
Rv0826	Mb0849	Rv0800	Rv0687
Rv0827c	Mb0850C	Rv0826	Rv0754
Rv0834c	Mb0857C	Rv0827c	Rv0763c
Rv0836c	Mb0859C	Rv0834c	Rv0766c
Rv0837c	Mb0860C	Rv0836c	Rv0767c
Rv0839	Mb0862	Rv0837c	Rv0791c
Rv0840c	Mb0863C	Rv0839	Rv0792c
Rv0841	Mb0864	Rv0840c	Rv0793
Rv0842	Mb0865	Rv0841	Rv0826
Rv0847	Mb0870	Rv0842	Rv0827c
Rv0848	Mb0871	Rv0847	Rv0834c
Rv0849	Mb0872	Rv0848	Rv0847
Rv0850	Mb0873	Rv0849	Rv0976c
Rv0867c	Mb0891C	Rv0850	Rv0986
Rv0879c	Mb0903C	Rv0867c	Rv0989c
Rv0886	Mb0910	Rv0879c	Rv0990c
Rv0887c	Mb0911C	Rv0886	Rv0991c
Rv0909	Mb0933	Rv0887c	Rv1048c
Rv0918	Mb0942	Rv0909	Rv1169c
Rv0921	Mb0945	Rv0918	Rv1221
the5' end of Rv0933	Mb0957	Rv0921	Rv1284
Rv0962c	Mb0987C	Rv0933	Rv1405c
Rv0974c	Mb0999C	Rv0962c	Rv1471
the5' end of Rv0975c	Mb1000C	Rv0974c	Rv1472
Rv0976c	Mb1001C	Rv0975c	Rv1628c
Rv0979A	Mb1005	Rv0976c	Rv1806
Rv0984	Mb1010	Rv0979A	Rv1875
Rv0985c	Mb1011C	Rv0984	Rv1895
Rv0986	Mb1012	Rv0985c	Rv1928c
5' end of Rv0987	Mb1013	Rv0986	Rv1955
3' end of Rv0987	Mb1014	Rv0987	Rv1956
Rv0988	Mb1015	Rv0988	Rv1959c
Rv0989c	Mb1016C	Rv0989c	Rv1960c
Rv0990c	Mb1017C	Rv0990c	Rv1985c
Rv0991c	Mb1018C	Rv0991c	Rv1989c
Rv0993	Mb1020	Rv0993	Rv1990c
Rv0995	Mb1022	Rv0995	Rv1994c
Rv1034c	Mb1063C	Rv1034c	Rv2011c
Rv1037c	Mb1066C	Rv1037c	Rv2012
Rv1038c	Mb1067C	Rv1038c	Rv2020c
Rv1039c	Mb1068C	Rv1039c	Rv2021c
Rv1040c	Mb1069C	Rv1040c	Rv2025c
Rv1041c	Mb1070C	Rv1041c	Rv2034
Rv1044	Mb1073	Rv1044	Rv2035
Rv1045	Mb1074	Rv1045	Rv2036
Rv1048c	Mb1077C	Rv1048c	Rv2123
Rv1049	Mb1078	Rv1049	Rv2359
Rv1057	Mb1086	Rv1057	Rv2465c
Rv1058	Mb1087	Rv1058	Rv2466c
Rv1066	Mb1095	Rv1066	Rv2504c
Rv1073	Mb1102	Rv1073	Rv2517c
Rv1075c	Mb1104C	Rv1075c	Rv2617c
Rv1076	Mb1105	Rv1076	Rv2642
3' end of Rv1101c	Mb1131C	Rv1101c	Rv2643
Rv1108c	Mb1138C	Rv1108c	Rv2662
Rv1109c	Mb1139C	Rv1109c	Rv2694c
Rv1113	Mb1143	Rv1113	Rv2865
Rv1150	Mb1181	Rv1150	Rv2866
Rv1158c	Mb1189C	Rv1158c	Rv2913c
3' end of Rv1168c	Mb1200C	Rv1168c	Rv3161c
5' end of Rv1168c	Mb1201C	Rv1169c	Rv3176c
Rv1169c	Mb1202C	Rv1186c	Rv3182
Rv1186c	Mb1218C	Rv1197	Rv3197A
Rv1197	Mb1229	Rv1221	Rv3206c
Rv1221	Mb1253	Rv1222	Rv3269
Rv1222	Mb1254	Rv1228	Rv3290c
Rv1228	Mb1260	Rv1283c	Rv3334
Rv1283c	Mb1314C	Rv1284	Rv3406
Rv1284	Mb1315	Rv1285	Rv3503c
Rv1285	Mb1316	Rv1286	Rv3515c
Rv1286	Mb1317	Rv1287	Rv3526
Rv1287	Mb1318	Rv1290A	Rv3527
Rv1290A	Mb1322	Rv1291c	Rv3530c
Rv1291c	Mb1323C	Rv1311	Rv3531c
Rv1311	Mb1343	Rv1316c	Rv3533c
Rv1316c	Mb1349C	Rv1342c	Rv3534c
Rv1342c	Mb1377C	Rv1343c	Rv3536c
Rv1343c	Mb1378C	Rv1344	Rv3537
Rv1344	Mb1379	Rv1347c	Rv3545c
Rv1347c	Mb1382C	Rv1348	Rv3571
Rv1348	Mb1383	Rv1349	Rv3574
Rv1349	Mb1384	Rv1350	Rv3681c
Rv1350	Mb1385	Rv1355c	Rv3913
Rv1355c	Mb1390C	Rv1358	Rv1733c
Rv1358	Mb1393	Rv1373	Rv2626c
the5' end of Rv1373	Mb1407	Rv1374c	Rv2627c
Rv1374c	Mb1409C	Rv1376	Rv2628
Rv1376	Mb1411	Rv1377c	Rv2830c
Rv1377c	Mb1412C	Rv1378c
Rv1378c	Mb1413C	Rv1384
Rv1384	Mb1419	Rv1385
Rv1385	Mb1420	Rv1386
Rv1386	Mb1421	Rv1387
Rv1387	Mb1422	Rv1395
Rv1395	Mb1430	Rv1400c
Rv1400c	Mb1435C	Rv1402
Rv1402	Mb1437	Rv1405c
Rv1405c	Mb1440C	Rv1408
Rv1408	Mb1443	Rv1446c
Rv1446c	Mb1481C	Rv1461
Rv1461	Mb1496	Rv1462
Rv1462	Mb1497	Rv1463
Rv1463	Mb1498	Rv1464
Rv1464	Mb1499	Rv1465
Rv1465	Mb1500	Rv1466
Rv1466	Mb1501	Rv1471
Rv1471	Mb1506	Rv1472
Rv1472	Mb1507	Rv1473A
Rv1473A	Mb1509	Rv1477
Rv1477	Mb1513	Rv1478
Rv1478	Mb1514	Rv1502
Rv1502	Mb1541	Rv1519
Rv1519	Mb1546	Rv1528c
Rv1528c	Mb1555C	Rv1557
3' end of Rv1557	Mb1583	Rv1566c
Rv1566c	Mb1593C	Rv1575
Rv1575	Mb1601	Rv1583c
Rv1583c	Mb1609C	Rv1584c
Rv1584c	Mb1610C	Rv1585c
Rv1585c	Mb1611C	Rv1586c
Rv1586c	Mb1612C	Rv1587c
Rv1587c	Mb1613C	Rv1593c
Rv1593c	Mb1619C	Rv1602
Rv1602	Mb1628	Rv1611
Rv1611	Mb1637	Rv1613
Rv1613	Mb1639	Rv1622c
Rv1622c	Mb1648C	Rv1628c
Rv1628c	Mb1654C	Rv1647
Rv1647	Mb1674	Rv1659
Rv1659	Mb1687	Rv1670
Rv1670	Mb1697	Rv1671
Rv1671	Mb1698	Rv1673c
Rv1673c	Mb1700C	Rv1674c
Rv1674c	Mb1701C	Rv1676
Rv1676	Mb1703	Rv1678
Rv1678	Mb1705	Rv1679
Rv1679	Mb1706	Rv1680
Rv1680	Mb1707	Rv1693
Rv1693	Mb1719	Rv1694
Rv1694	Mb1720	Rv1695
Rv1695	Mb1721	Rv1704c
Rv1704c	Mb1730C	Rv1706A
Rv1706A	Mb1733C	Rv1719
Rv1719	Mb1748	Rv1720c
Rv1720c	Mb1749C	Rv1721c
Rv1721c	Mb1750C	Rv1733c
Rv1733c	Mb1762C	Rv1735c
Rv1735c	Mb1764C	Rv1736c
Rv1736c	Mb1765C	Rv1738
Rv1738	Mb1767	Rv1739c
Rv1739c	Mb1768C	Rv1740
Rv1740	Mb1769	Rv1742
Rv1742	Mb1771	Rv1767
Rv1767	Mb1796	Rv1772
Rv1772	Mb1801	Rv1773c
Rv1773c	Mb1802C	Rv1774
Rv1774	Mb1803	Rv1775
Rv1775	Mb1804	Rv1776c
Rv1776c	Mb1805C	Rv1801
Rv1801	Mb1829	Rv1802
Rv1802	Mb1830	Rv1804c
Rv1804c	Mb1833C	Rv1805c
Rv1805c	Mb1834C	Rv1806
Rv1806	Mb1835	Rv1807
Rv1807	Mb1836	Rv1808
Rv1808	Mb1837	Rv1809
5' end of Rv1809	Mb1838	Rv1811
3' end of Rv1809	Mb1839	Rv1812c
Rv1811	Mb1841	Rv1813c
Rv1812c	Mb1842C	Rv1816
Rv1813c	Mb1843C	Rv1817
Rv1816	Mb1846	Rv1832
Rv1817	Mb1848	Rv1847
Rv1832	Mb1863	Rv1853
Rv1847	Mb1878	Rv1854c
Rv1853	Mb1884	Rv1875
Rv1854c	Mb1885C	Rv1884c
Rv1875	Mb1906	Rv1890c
Rv1884c	Mb1916C	Rv1894c
Rv1890c	Mb1923C	Rv1895
Rv1894c	Mb1927C	Rv1906c
5' end of Rv1895	Mb1928	Rv1919c
middle part of Rv1895	Mb1929	Rv1928c
Rv1906c	Mb1941C	Rv1935c
Rv1919c	Mb1954C	Rv1936
Rv1928c	Mb1963C	Rv1937
Rv1935c	Mb1970C	Rv1942c
Rv1936	Mb1971	Rv1943c
Rv1937	Mb1972	Rv1950c
Rv1942c	Mb1977C	Rv1955
Rv1943c	Mb1978C	Rv1956
Rv1950c	Mb1985C	Rv1959c
Rv1955	Mb1990	Rv1960c
Rv1956	Mb1991	Rv1964
Rv1959c	Mb1994C	Rv1985c
Rv1960c	Mb1995C	Rv1986
5' end of Rv1964	Mb1999	Rv1989c
Rv1985c	Mb2007C	Rv1990A
Rv1986	Mb2008	Rv1990c
Rv1989c	Mb2011C	Rv1991A
Rv1990c	Mb2012C	Rv1991c
Rv1990A	Mb2013C	Rv1992c
Rv1991A	Mb2014A	Rv1993c
Rv1991c	Mb2014C	Rv1994c
Rv1992c	Mb2015C	Rv1995
Rv1993c	Mb2016C	Rv1996
Rv1994c	Mb2017C	Rv1997
Rv1995	Mb2018	Rv1998c
Rv1996	Mb2019	Rv1999c
Rv1997	Mb2020	Rv2004c
Rv1998c	Mb2021C	Rv2005c
Rv1999c	Mb2022C	Rv2006
Rv2004c	Mb2027C	Rv2007c
Rv2005c	Mb2028C	Rv2008c
Rv2006	Mb2029	Rv2009
Rv2007c	Mb2030C	Rv2011c
Rv2008c	Mb2031C	Rv2012
Rv2009	Mb2032	Rv2013
Rv2011c	Mb2034C	Rv2016
Rv2012	Mb2035	Rv2017
Rv2013	Mb2036	Rv2019
Rv2016	Mb2039	Rv2020c
Rv2017	Mb2040	Rv2021c
Rv2019	Mb2042	Rv2025c
Rv2020c	Mb2043C	Rv2028c
Rv2021c	Mb2044C	Rv2029c
Rv2025c	Mb2050C	Rv2030c
Rv2028c	Mb2053C	Rv2031c
Rv2029c	Mb2054C	Rv2032
3' end of Rv2030c	Mb2055C	Rv2033c
5' end of Rv2030c	Mb2056C	Rv2034
Rv2031c	Mb2057C	Rv2035
Rv2032	Mb2058	Rv2036
Rv2033c	Mb2059C	Rv2037c
Rv2034	Mb2060	Rv2061c
Rv2035	Mb2061	Rv2069
Rv2036	Mb2062	Rv2086
Rv2037c	Mb2063C	Rv2087
Rv2061c	Mb2087C	Rv2099c
Rv2069	Mb2095	Rv2107
Rv2086	Mb2113	Rv2108
Rv2087	Mb2114	Rv2121c
Rv2099c	Mb2125C	Rv2123
Rv2107	Mb2131	Rv2142c
Rv2108	Mb2132	Rv2150c
Rv2121c	Mb2145C	Rv2155c
Rv2123	Mb2147	Rv2159c
Rv2142c	Mb2166C	Rv2160A
Rv2150c	Mb2174C	Rv2161c
Rv2155c	Mb2179C	Rv2169c
Rv2159c	Mb2183C	Rv2187
5' end of Rv2160A	Mb2184C	Rv2188c
Rv2161c	Mb2185C	Rv2239c
Rv2169c	Mb2191C	Rv2240c
3' end of Rv2187	Mb2210	Rv2252
Rv2188c	Mb2211C	Rv2253
Rv2239c	Mb2263C	Rv2254c
Rv2240c	Mb2264C	Rv2255c
Rv2252	Mb2276	Rv2269c
Rv2253	Mb2277	Rv2270
Rv2254c	Mb2278C	Rv2280
Rv2255c	Mb2279C	Rv2281
Rv2269c	Mb2292C	Rv2288
Rv2270	Mb2293	Rv2307A
Rv2280	Mb2301	Rv2307B
Rv2281	Mb2302	Rv2309A
Rv2288	Mb2310	Rv2310
Rv2307A	Mb2331C	Rv2322c
Rv2307B	Mb2332C	Rv2331A
Rv2309A	Mb2336	Rv2332
Rv2310	Mb2337	Rv2334
Rv2322c	Mb2349C	Rv2340c
Rv2331A	Mb2359	Rv2359
Rv2332	Mb2360	Rv2382c
Rv2334	Mb2362	Rv2383c
Rv2340c	Mb2369C	Rv2384
Rv2359	Mb2380	Rv2385
Rv2382c	Mb2403C	Rv2386c
Rv2383c	Mb2404C	Rv2406c
Rv2384	Mb2405	Rv2416c
Rv2385	Mb2406	Rv2428
Rv2386c	Mb2407C	Rv2432c
Rv2406c	Mb2429C	Rv2450c
Rv2416c	Mb2439C	Rv2451
oxyR'	Mb2452C	Rv2453c
oxyR'	Mb2453C	Rv2454c
Rv2428	Mb2454	Rv2465c
Rv2432c	Mb2458C	Rv2466c
Rv2450c	Mb2477C	Rv2468A
Rv2451	Mb2478	Rv2487c
Rv2453c	Mb2480C	Rv2491
Rv2454c	Mb2481C	Rv2492
Rv2465c	Mb2492C	Rv2503c
Rv2466c	Mb2493C	Rv2504c
Rv2468A	MB2495A	Rv2505c
middlesectionof Rv2487c	Mb2513C	Rv2514c
Rv2491	Mb2519	Rv2515c
Rv2492	Mb2520	Rv2516c
Rv2503c	Mb2531C	Rv2517c
Rv2504c	Mb2532C	Rv2518c
Rv2505c	Mb2533C	Rv2523c
Rv2514c	Mb2543C	Rv2524c
Rv2515c	Mb2544C	Rv2546
Rv2516c	Mb2545C	Rv2566
Rv2517c	Mb2546C	Rv2577
Rv2518c	Mb2547C	Rv2595
Rv2523c	Mb2552C	Rv2614A
Rv2524c	Mb2553C	Rv2616
Rv2546	Mb2576	Rv2617c
5' end of Rv2566	Mb2595	Rv2622
3' end of Rv2577	Mb2608	Rv2623
Rv2595	Mb2626	Rv2624c
Rv2614A	Mb2647	Rv2625c
Rv2616	Mb2649	Rv2626c
Rv2617c	Mb2650C	Rv2627c
Rv2622	Mb2655	Rv2628
Rv2623	Mb2656	Rv2629
Rv2624c	Mb2657C	Rv2630
Rv2625c	Mb2658C	Rv2631
Rv2626c	Mb2659C	Rv2633c
Rv2627c	Mb2660C	Rv2635
Rv2628	Mb2661	Rv2638
Rv2629	Mb2662	Rv2639c
Rv2630	Mb2663	Rv2640c
Rv2631	Mb2664	Rv2641
Rv2633c	Mb2666C	Rv2642
Rv2635	Mb2668	Rv2643
Rv2638	Mb2671	Rv2662
Rv2639c	Mb2672C	Rv2667
Rv2640c	Mb2673C	Rv2694c
Rv2641	Mb2674	Rv2697c
Rv2642	Mb2675	Rv2706c
Rv2643	Mb2676	Rv2707
Rv2662	Mb2680	Rv2712c
Rv2667	Mb2686	Rv2729c
Rv2694c	Mb2713C	Rv2738c
Rv2697c	Mb2716C	Rv2739c
Rv2706c	Mb2725C	Rv2761c
Rv2707	Mb2726	Rv2762c
Rv2712c	Mb2731C	Rv2773c
Rv2729c	Mb2748C	Rv2787
Rv2738c	Mb2758C	Rv2798c
Rv2739c	Mb2759C	Rv2799
Rv2761c	Mb2782C	Rv2803
3' end of Rv2762c	Mb2783C	Rv2812
Rv2773c	Mb2795C	Rv2815c
Rv2787	Mb2810	Rv2829c
Rv2798c	Mb2821C	Rv2830c
Rv2799	Mb2822	Rv2835c
Rv2803	Mb2826	Rv2865
3' end of Rv2812	Mb2836	Rv2866
Rv2815c	Mb2839C	Rv2873
Rv2829c	Mb2853C	Rv2874
Rv2830c	Mb2854C	Rv2891
3' end of Rv2835c	Mb2859C	Rv2897c
5' end of Rv2835c	Mb2860C	Rv2910c
Rv2865	Mb2890	Rv2911
Rv2866	Mb2891	Rv2912c
Rv2873	Mb2898	Rv2913c
Rv2874	Mb2899	Rv2928
Rv2891	Mb2915	Rv2960c
Rv2897c	Mb2921C	Rv2961
Rv2910c	Mb2934C	Rv2963
Rv2911	Mb2935	Rv2977c
Rv2912c	Mb2936C	Rv2979c
Rv2913c	Mb2937C	Rv2982c
Rv2928	Mb2953	Rv2983
	Mb2970CA	Rv2993c
Rv2960c	Mb2984C	Rv2998
Rv2961	Mb2985	Rv3006
Rv2963	Mb2987	Rv3012c
	Mb2999CA	Rv3014c
Rv2977c	Mb3001C	Rv3017c
Rv2979c	Mb3003C	Rv3022A
Rv2982c	Mb3006C	Rv3027c
Rv2983	Mb3007	Rv3047c
Rv2993c	Mb3017C	Rv3051c
Rv2998	Mb3022	Rv3052c
Rv3006	Mb3031	Rv3054c
Rv3012c	Mb3037C	Rv3060c
Rv3014c	Mb3039C	Rv3061c
Rv3017c	Mb3042C	Rv3074
Rv3022A	Mb3048C	Rv3080c
Rv3027c	Mb3053C	Rv3097c
Rv3047c	Mb3073C	Rv3098A
Rv3051c	Mb3077C	Rv3111
Rv3052c	Mb3078C	Rv3113
Rv3054c	Mb3080C	Rv3114
Rv3060c	Mb3086C	Rv3126c
3' end of Rv3061c	Mb3087C	Rv3127
5' end of Rv3061c	Mb3088C	Rv3128c
Rv3074	Mb3101	Rv3129
Rv3080c	Mb3107C	Rv3130c
Rv3097c	Mb3124C	Rv3131
Rv3098A	Mb3125A	Rv3132c
Rv3111	Mb3138	Rv3133c
Rv3113	Mb3140	Rv3134c
Rv3114	Mb3141	Rv3145
Rv3126c	Mb3149C	Rv3146
Rv3127	Mb3150	Rv3147
3' end of Rv3128c	Mb3151C	Rv3148
5' end of Rv3128c	Mb3152C	Rv3149
Rv3129	Mb3153	Rv3150
Rv3130c	Mb3154C	Rv3151
Rv3131	Mb3155	Rv3152
Rv3132c	Mb3156C	Rv3153
Rv3133c	Mb3157C	Rv3154
Rv3134c	Mb3158C	Rv3155
Rv3145	Mb3169	Rv3156
Rv3146	Mb3170	Rv3157
Rv3147	Mb3171	Rv3158
Rv3148	Mb3172	Rv3161c
Rv3149	Mb3173	Rv3167c
Rv3150	Mb3174	Rv3168
Rv3151	Mb3175	Rv3169
Rv3152	Mb3176	Rv3172c
Rv3153	Mb3177	Rv3176c
Rv3154	Mb3178	Rv3177
Rv3155	Mb3179	Rv3178
Rv3156	Mb3180	Rv3182
Rv3157	Mb3181	Rv3183
Rv3158	Mb3182	Rv3197A
	Mb3184C	Rv3203
Rv3161c	Mb3186C	Rv3204
Rv3167c	Mb3192C	Rv3206c
Rv3168	Mb3193	Rv3224
Rv3169	Mb3194	Rv3249c
Rv3172c	Mb3197C	Rv3250c
3' end of Rv3176c	Mb3201C	Rv3251c
5' end of Rv3176c	Mb3202C	Rv3252c
Rv3177	Mb3203	Rv3269
Rv3178	Mb3204	Rv3270
Rv3182	Mb3208	Rv3286c
Rv3183	Mb3209	Rv3287c
Rv3197A	Mb3221C	Rv3288c
Rv3203	Mb3228	Rv3289c
Rv3204	Mb3229	Rv3290c
Rv3206c	Mb3231C	Rv3295
Rv3224	Mb3251	Rv3303c
Rv3249c	Mb3277C	Rv3312A
Rv3250c	Mb3278C	Rv3321c
Rv3251c	Mb3279C	Rv3332
Rv3252c	Mb3280C	Rv3334
Rv3269	Mb3297	Rv3342
Rv3270	Mb3298	Rv3347c
Rv3286c	Mb3314C	Rv3351c
Rv3287c	Mb3315C	Rv3370c
Rv3288c	Mb3316C	Rv3394c
Rv3289c	Mb3317C	Rv3395c
Rv3290c	Mb3318C	Rv3402c
Rv3295	Mb3323	Rv3405c
Rv3303c	Mb3331C	Rv3406
Rv3312A	Mb3341C	Rv3407
Rv3321c	Mb3350C	Rv3415c
RvD5	Mb3358	Rv3416
Rv3332	Mb3365	Rv3417c
Rv3334	Mb3367	Rv3447c
Rv3342	Mb3374	Rv3448
3' end of Rv3347c	Mb3379C	Rv3462c
5' end of Rv3347c	Mb3380C	Rv3463
Rv3351c	Mb3386C	Rv3471c
Rv3370c	Mb3405C	Rv3477
Rv3394c	Mb3426C	Rv3489
Rv3395c	Mb3427C	Rv3494c
5' end of Rv3402c	Mb3436C	Rv3501c
Rv3405c	Mb3439C	Rv3502c
Rv3406	Mb3440	Rv3503c
Rv3407	Mb3441	Rv3504
Rv3415c	Mb3449C	Rv3505
Rv3416	Mb3450	Rv3506
Rv3417c	Mb3451C	Rv3513c
Rv3447c	Mb3477C	Rv3515c
Rv3448	Mb3478	Rv3516
Rv3462c	Mb3491C	Rv3517
Rv3463	Mb3492	Rv3518c
Rv3471c	Mb3500C	Rv3526
Rv3477	Mb3504	Rv3527
Rv3489	Mb3519	Rv3528c
Rv3494c	Mb3524C	Rv3529c
Rv3501c	Mb3531C	Rv3530c
Rv3502c	Mb3532C	Rv3531c
Rv3503c	Mb3533C	Rv3532
Rv3504	Mb3534	Rv3533c
Rv3505	Mb3535	Rv3534c
Rv3506	Mb3536	Rv3535c
Rv3513c	Mb3542C	Rv3536c
Rv3515c	Mb3544C	Rv3537
Rv3516	Mb3545	Rv3538
Rv3517	Mb3546	Rv3539
3' end of Rv3518c	Mb3547C	Rv3542c
5' end of Rv3518c	Mb3548C	Rv3543c
Rv3526	Mb3556	Rv3544c
Rv3527	Mb3557	Rv3545c
Rv3528c	Mb3558C	Rv3546
Rv3529c	Mb3559C	Rv3566A
Rv3530c	Mb3560C	Rv3567c
Rv3531c	Mb3561C	Rv3568c
Rv3532	Mb3562	Rv3569c
Rv3533c	Mb3563C	Rv3570c
Rv3534c	Mb3564C	Rv3571
Rv3535c	Mb3565C	Rv3573c
Rv3536c	Mb3566C	Rv3574
Rv3537	Mb3567	Rv3575c
Rv3538	Mb3568	Rv3588c
Rv3539	Mb3569	Rv3591c
Rv3542c	Mb3572C	Rv3637
Rv3543c	Mb3573C	Rv3638
Rv3544c	Mb3574C	Rv3639c
Rv3545c	Mb3575C	Rv3640c
Rv3546	Mb3576	Rv3655c
Rv3566A	Mb3597C	Rv3659c
Rv3567c	Mb3598C	Rv3660c
Rv3568c	Mb3599C	Rv3662c
Rv3569c	Mb3600C	Rv3664c
Rv3570c	Mb3601C	Rv3666c
Rv3571	Mb3602	Rv3678A
Rv3573c	Mb3604C	Rv3681c
Rv3574	Mb3605	Rv3692
Rv3575c	Mb3606C	Rv3697A
Rv3588c	Mb3619C	Rv3702c
Rv3591c	Mb3622C	Rv3706c
Rv3637	Mb3661	Rv3729
Rv3638	Mb3662	Rv3745c
Rv3639c	Mb3663C	Rv3746c
Rv3640c	Mb3664C	Rv3751
Rv3655c	Mb3679C	Rv3757c
Rv3659c	Mb3683C	Rv3771c
Rv3660c	Mb3684C	Rv3773c
Rv3662c	Mb3686C	Rv3774
Rv3664c	Mb3688C	Rv3776
Rv3666c	Mb3690C	Rv3777
Rv3678A	Mb3703C	Rv3793
Rv3681c	Mb3706C	Rv3799c
Rv3692	Mb3717	Rv3807c
Rv3697A	Mb3723A	Rv3830c
Rv3702c	Mb3728C	Rv3833
Rv3706c	Mb3733C	Rv3834c
Rv3729	Mb3756	Rv3853
Rv3745c	Mb3771C	Rv3854c
Rv3746c	Mb3772C	Rv3855
Rv3751	Mb3777	Rv3856c
Rv3757c	Mb3783C	Rv3861
Rv3771c	Mb3799C	Rv3889c
5' end of Rv3773c	Mb3802C	Rv3913
Rv3774	Mb3803	Rv3914
Rv3776	Mb3805	Rv3922c
Rv3777	Mb3806	Rv3923c
Rv3793	Mb3822	RvD5
Rv3799c	Mb3829C
Rv3807c	Mb3837C
Rv3830c	Mb3860C
Rv3833	Mb3863
Rv3834c	Mb3864C
	Mb3875CC
Rv3853	Mb3883
Rv3854c	Mb3884C
Rv3855	Mb3885
Rv3856c	Mb3886C
Rv3861	Mb3891
5' end of Rv3889c	Mb3918C
Rv3913	Mb3944
Rv3914	Mb3945
Rv3922c	Mb3953C
Rv3923c	Mb3954C
